# Supplementary material
Source: PubMed Central journal article supplement (PMC3176961)
Supplement: NIHMS282601-supplement-01.pdf [file NIHMS282601-supplement-01.pdf]

## Supplemental Information

**Table S1.** Demographic data of subjects.

|                                             | <b>Sex</b> | <b>Age</b> | <b>pH</b> | <b>PMI</b> | <b>RIN</b> |
|---------------------------------------------|------------|------------|-----------|------------|------------|
| <b>Comparison Group</b><br>( <i>n</i> = 20) | Male       | 58         | 6.58      | 7.00       |            |
|                                             | Male       | 93         | 6.60      | 4.17       | 6.50       |
|                                             | Male       | 59         | 6.61      | 20.42      | 8.30       |
|                                             | Male       | 64         | 6.69      | 23.75      | 7.10       |
|                                             | Male       | 68         | 6.55      | 2.75       | 7.20       |
|                                             | Male       | 65         | 6.82      | 3.83       | 6.90       |
|                                             | Male       | 69         | 6.67      | 7.42       | 8.40       |
|                                             | Male       | 73         | 6.17      | 14.92      | 4.10       |
|                                             | Male       | 75         | 6.43      | 5.00       | 7.70       |
|                                             | Female     | 82         | 6.50      | 5.67       | 7.00       |
|                                             | Female     | 80         | 6.20      | 4.75       | 7.00       |
|                                             | Female     | 85         | 6.30      | 4.33       | 7.80       |
|                                             | Female     | 73         | 6.30      | 3.38       | 8.10       |
|                                             | Female     | 89         | 6.72      | 2.33       | 7.80       |
|                                             | Female     | 82         | 6.31      | 29.00      | 7.90       |
|                                             | Female     | 79         | 6.38      | 10.08      | 7.50       |
|                                             | Female     | 80         | 6.63      | 3.83       | 5.30       |
|                                             | Female     | 78         | 6.97      | 16.00      | 6.90       |
|                                             | Female     | 62         | 6.63      | 7.00       | 7.00       |
|                                             | Female     | 74         | 6.32      | 4.75       | 6.10       |
|                                             | Mean       | 74.4       | 6.52      | 9.02       | 7.08       |
|                                             | SD         | 9.8        | 0.21      | 7.68       | 1.05       |
| <b>Schizophrenia</b><br>( <i>n</i> = 14)    | Male       | 84         | 7.00      | 5.25       | 8.20       |
|                                             | Male       | 66         | 6.50      | 12.08      | 7.30       |
|                                             | Male       | 92         | 6.67      | 26.03      | 7.40       |
|                                             | Male       | 76         | 6.70      | 16.58      | 7.50       |
|                                             | Male       | 84         | 6.71      | 17.73      | 7.10       |
|                                             | Male       | 82         | 6.74      | 11.38      | 5.50       |
|                                             | Male       | 70         | 6.35      | 7.17       | 6.30       |
|                                             | Male       | 73         | 6.30      | 11.68      | 6.70       |
|                                             | Male       | 57         | 6.50      | 32.33      | 8.90       |
|                                             | Male       | 97         | 6.50      | 25.92      | 5.50       |
|                                             | Female     | 71         | 6.60      | 5.50       | 7.10       |
|                                             | Female     | 89         | 6.20      | 9.63       | 7.20       |
|                                             | Female     | 86         | 6.56      | 18.20      | 6.90       |
|                                             | Female     | 81         | 6.47      | 15.08      | 6.90       |
|                                             | Mean       | 79.1       | 6.56      | 15.33      | 7.04       |
|                                             | SD         | 10.9       | 0.20      | 8.17       | 0.91       |

PMI, postmortem interval in hours; Age refers to age at death of the subject in years; RIN, RNA integrity number; SD, standard deviation.

**Table S2.** Gene expression assays tested in postmortem tissue.

| <b>Protein</b>     | <b>Gene</b>                                            | <b>Assay</b>  |
|--------------------|--------------------------------------------------------|---------------|
| GLUR1, GLUA1       | glutamate receptor, ionotropic, AMPA 1                 | Hs00181348_m1 |
| GLUR2, GLUA2       | glutamate receptor, ionotropic, AMPA 2                 | Hs00181331_m1 |
| GLUR3, GLUA3       | glutamate receptor, ionotropic, AMPA 3                 | Hs00241485_m1 |
| GLUR4, GLUA4       | glutamate receptor, ionotropic, AMPA 4                 | Hs00898778_m1 |
| GLUR5, GLUK1       | glutamate receptor, ionotropic, kainate 1              | Hs00168165_m1 |
| GLUR6, GLUK2       | glutamate receptor, ionotropic, kainate 2              | Hs00222637_m1 |
| GLUR7, GLUK3       | glutamate receptor, ionotropic, kainate 3              | Hs00168182_m1 |
| KA1, GLUK4         | glutamate receptor, ionotropic, kainate 4              | Hs00205979_m1 |
| KA2, GLUK5         | glutamate receptor, ionotropic, kainate 5              | Hs00361590_m1 |
| NR1, GLUN1         | glutamate receptor, ionotropic, NMDA 1                 | Hs00609557_m1 |
| NR2A, GLUN2A       | glutamate receptor, ionotropic, NMDA 2A                | Hs01058345_m1 |
| NR2B, GLUN2B       | glutamate receptor, ionotropic, NMDA 2B                | Hs00168230_m1 |
| NR2C, GLUN2C       | glutamate receptor, ionotropic, NMDA 2C                | Hs01016626_m1 |
| NR2D, GLUN2D       | glutamate receptor, ionotropic, NMDA 2D                | Hs00181352_m1 |
| NR3A, GLUN3A       | glutamate receptor, ionotropic, NMDA 3A                | Hs00370290_m1 |
| mGluR1             | glutamate receptor, metabotropic 1                     | Hs00168250_m1 |
| mGluR2             | glutamate receptor, metabotropic 2                     | Hs00356062_m1 |
| mGluR3             | glutamate receptor, metabotropic 3                     | Hs00168260_m1 |
| mGluR4             | glutamate receptor, metabotropic 4                     | Hs00168265_m1 |
| mGluR5             | glutamate receptor, metabotropic 5                     | Hs00168275_m1 |
| mGluR6             | glutamate receptor, metabotropic 6                     | Hs00968692_m1 |
| mGluR7             | glutamate receptor, metabotropic 7                     | Hs00356067_m1 |
| mGluR8             | glutamate receptor, metabotropic 8                     | Hs00168299_m1 |
| HOMER1             | homer homolog 1 (Drosophila)                           | Hs00188676_m1 |
| HOMER2             | homer homolog 2 (Drosophila)                           | Hs00191454_m1 |
| HOMER3             | homer homolog 3 (Drosophila)                           | Hs00191446_m1 |
| shank              | SH3 and multiple ankyrin repeat domains 2              | Hs00373170_m1 |
| SAP97              | discs, large homolog 1 (Drosophila)                    | Hs00938204_m1 |
| SAP102             | synapse associated protein 102                         | Hs00221664_m1 |
| PSD95/ SAP90/ GKAP | postsynaptic density protein 95                        | Hs00176354_m1 |
| PICK1              | protein interacting with PRKCA 1                       | Hs00202661_m1 |
| GRIP1              | glutamate receptor interacting protein 1               | Hs00402711_m1 |
| NF-L               | neurofilament, light polypeptide 68kDa                 | Hs00196245_m1 |
| SYNGAP1            | synaptic Ras GTPase activating protein 1               | Hs00405348_m1 |
| Stargazin          | calcium channel, voltage-dependent, $\gamma$ subunit 2 | Hs00196045_m1 |
| ACTB               | Beta-actin                                             | Hs 9999903_m1 |
| B2M                | beta-2-microglobulin                                   | Hs 9999907_m1 |
| GAPDH              | glyceraldehyde-3-phosphate dehydrogenase               | Hs 9991905_m1 |
| SLC17A6            | vesicular glutamate transporter 2 (VGLUT2)             | Hs00220449_m1 |
| ENO2               | Neuron specific enolase (NSE)                          | Hs 0157360_m1 |
| GFAP               | glial fibrillary acidic protein                        | Hs 0157674_m1 |
| GAD67              | glutamate decarboxylase 1 (brain, 67kDa) GAD1          | Hs 0241471_m1 |
